# Supplementary material
Source: publisher site journal article supplement (https://www.dovepress.com/get_supplementary_file.php?f=472816.docx)
Supplement: Supplementary file 1 [file get_supplementary_file.php]

**Online supplement 1. The Adapted Physical Activities-Health Education (APA-HE) program**

- Exercises aimed at improving postural function and balance included monopodal/bipodal work, on dominant/non-dominant side, walking and regular/irregular movement, with variation in speed of execution, variation, and orientation, eyes open/eyes closed, on hard/unstable ground, with shoes/bare feet, in single/double-task condition (with auditory and visual signals). Exercises were personalized and sufficiently challenging to mobilize adaptive capacities and cognitive function.

- Exercises aimed at improving joint and muscle function included exercises mobilizing the joints involved in gait and balance (foot, ankle, knee, hip and spine, both girdles) and exercises aimed at improving muscle function included static/dynamic work (isometric/anisometric), mono-articular/plural-articular work, work with body weight/with additional load, and work with obstacles.

- Exercises performed solo or in groups of ten were progressive in terms of intensity, difficulty, and repetition.

**Online supplement 2. The outcomes of the study**

- The maximum one-foot stance time on the dominant leg with eyes open and then closed [9]. For each test, the value used in the analysis was the best performance after two trials of 10 seconds, with 30 seconds of rest between each trial.

- The time to perform the timed up and go test [10] that consists of a 3-meter round-trip walk, with a U-turn, from a seated position. One single measurement was taken at comfort speed.

- The Short Physical Performance Battery score (SPPB), that comprises a balance test (10 seconds with feet together, then in semi-tandem and then in tandem position), the walking speed at usual speed over 4 meters with standing start, and the five sit-to-stand chair rising test [15].

- The maximum grip strength developed: two 3-second trials separated with 30 seconds of rest, in seated position with the forearm on a table and a 90° angle between the arm and the forearm. A pre-test allowed individual adjustment of grip of the JAMAR dynamometer [16].

- The concern about falling was assessed using the Falls Efficacy Scale [17].

- The fear of falling was assessed using a Visual Analog Scale. Participants were asked to rate their fear of falling on a scale from 0 (not afraid of falling at all) to 10 (very afraid of falling) [18].

- Body weight to assess the body mass index.
